# Supplementary material for: Toward Unifying Global Hotspots of Wild and Domesticated Biodiversity
Source: Plants (Basel). 2020 Aug 31;9(9):1128. doi: 10.3390/plants9091128 (PMC7569820; doi:10.3390/plants9091128)
Supplement: Supplementary file 1 [file plants-09-01128-s001.xlsx]

## Sheet: Sheet1
Data retrieved for the period: 01-01-2016 to 01-01-2020
Species	Number of Wikipedia page views
Mitragyna speciosa	5393240
Aloe vera	4196090
Ginkgo biloba	3205950
Moringa oleifera	3031211
Dendrocnide moroides	2835919
Salvia divinorum	2581101
Azadirachta indica	2129798
Cannabis sativa	1990046
Urtica dioica	1984618
Salvia hispanica	1982397
Papaver somniferum	1936528
Datura stramonium	1923558
Toxicodendron radicans	1891899
Ocimum tenuiflorum	1884171
Nelumbo nucifera	1775368
Passiflora edulis	1763662
Nigella sativa	1715592
Withania somnifera	1674090
Solanum aviculare	1581563
Hypericum perforatum	1531190
Garcinia gummi-gutta	1517245
Momordica charantia	1491686
Amorphophallus titanum	1435208
Brassica oleracea	1423915
Vicia faba	1415693
Conium maculatum	1396113
Camellia sinensis	1387634
Sequoiadendron giganteum	1339250
Maclura pomifera	1324009
Mimosa pudica	1259132
Lepidium meyenii	1197899
Epipremnum aureum	1180031
Synsepalum dulcificum	1155149
Salvia officinalis	1138876
Artemisia absinthium	1127277
Theobroma cacao	1125126
Pachyrhizus erosus	1106258
Sequoia sempervirens	1074964
Yucca brevifolia	1068391
Asimina triloba	1067318
Physalis peruviana	1065075
Portulaca oleracea	1061752
Coffea arabica	1046383
Ficus religiosa	1023835
Centella asiatica	1019800
Taxus baccata	984978
Illicium verum	983741
Phyllanthus emblica	972163
Delonix regia	962482
Hibiscus rosa-sinensis	956311
Tribulus terrestris	903424
Heracleum mantegazzianum	901932
Morinda citrifolia	891393
Ceratonia siliqua	890810
Capsicum annuum	890041
Silybum marianum	884605
Achillea millefolium	867686
Eleocharis dulcis	867341
Clitoria ternatea	858606
Laurus nobilis	846258
Agave tequilana	829648
Manilkara zapota	822743
Phytolacca americana	820156
Phaseolus vulgaris	805331
Colocasia esculenta	794121
Monstera deliciosa	780560
Crassula ovata	774106
Catharanthus roseus	766518
Pandanus amaryllifolius	752020
Acer palmatum	747639
Eleusine coracana	745494
Syzygium cumini	735917
Aegle marmelos	734795
Vaccinium vitis-idaea	731012
Robinia pseudoacacia	730388
Daucus carota	722650
Mangifera indica	713475
Platanus occidentalis	706573
Dianthus caryophyllus	704456
Jasminum sambac	698565
Vigna mungo	698379
Bacopa monnieri	695056
Ficus benjamina	692594
Liquidambar styraciflua	681334
Chlorophytum comosum	665131
Ipomoea aquatica	662374
Cassia fistula	651194
Juglans nigra	648972
Aesculus hippocastanum	647101
Bellis perennis	644717
Mucuna pruriens	632897
Araucaria araucana	625455
Cynodon dactylon	621201
Hedera helix	616874
Prunus spinosa	616026
Melicoccus bijugatus	608965
Althaea officinalis	608518
Ailanthus altissima	600769
Tinospora cordifolia	599407
Solanum nigrum	598688
Oryza sativa	595982
Pyrus calleryana	595112
Vitex agnus-castus	589982
Dioscorea alata	585080
Acer rubrum	584996
Populus tremuloides	581549
Pachira aquatica	579503
Paulownia tomentosa	579037
Agave americana	576797
Arbutus unedo	570735
Acer saccharum	569811
Borassus flabellifer	562952
Hevea brasiliensis	561964
Arnica montana	561569
Liriodendron tulipifera	558236
Helianthus annuus	557962
Saraca asoca	549620
Parthenocissus quinquefolia	544788
Mentha pulegium	542705
Chrysopogon zizanioides	541347
Rubus chamaemorus	540019
Acca sellowiana	537887
Vitis vinifera	537481
Cinnamomum camphora	537315
Cyperus esculentus	531306
Lycoris radiata	531051
Siraitia grosvenorii	530296
Toxicodendron diversilobum	526641
Mandragora officinarum	523386
Ceiba pentandra	521076
Syringa vulgaris	520340
Dracaena cinnabari	518084
Eurycoma longifolia	515972
Cedrus deodara	514999
Cercis canadensis	513441
Dalbergia sissoo	513173
Calotropis gigantea	512866
Allium tricoccum	510032
Lantana camara	509509
Ruta graveolens	506971
Cycas revoluta	505650
Abrus precatorius	503412
Brassica juncea	501144
Araucaria heterophylla	498546
Coccinia grandis	497476
Syzygium samarangense	497150
Plectranthus amboinicus	495380
Quercus alba	493335
Diospyros kaki	492267
Pinus strobus	489720
Thuja occidentalis	489529
Pyrus pyrifolia	488923
Lactuca virosa	488849
Eucalyptus deglupta	483089
Jacaranda mimosifolia	481884
Chenopodium album	481740
Toxicodendron vernix	481380
Taraxacum officinale	477304
Arabidopsis thaliana	475222
Pinus longaeva	469084
Cananga odorata	467883
Albizia julibrissin	465909
Aesculus glabra	465402
Prunus mume	463514
Butea monosperma	462759
Calendula officinalis	461806
Centaurea cyanus	461189
Garcinia indica	457814
Sassafras albidum	457009
Mimosa tenuiflora	450948
Eschscholzia californica	449883
Ziziphus mauritiana	447633
Ficus elastica	444755
Dypsis lutescens	444095
Bursera graveolens	442094
Hyssopus officinalis	442014
Acorus calamus	439015
Magnolia grandiflora	438654
Andrographis paniculata	438154
Opuntia ficus-indica	434017
Epiphyllum oxypetalum	432625
Prunus serotina	431632
Dipteryx odorata	429828
Jatropha curcas	429054
Monotropa uniflora	428335
Humulus lupulus	427347
Allium ursinum	425205
Juniperus virginiana	424598
Thuja plicata	422897
Cinnamomum cassia	422872
Psidium guajava	422715
Sabal palmetto	421608
Primula vulgaris	421566
Banisteriopsis caapi	420300
Rauvolfia serpentina	420234
Shorea robusta	419395
Picea abies	418769
Eragrostis tef	417918
Terminalia arjuna	417444
Mirabilis jalapa	416877
Phyllanthus niruri	416275
Terminalia chebula	413730
Cornus florida	411283
Camellia japonica	407372
Passiflora incarnata	406986
Sambucus nigra	406241
Leptospermum scoparium	404774
Eryngium foetidum	402843
Euryale ferox	402816
Hyoscyamus niger	400016
Taxodium distichum	397108
Pouteria sapota	396383
Nyctanthes arbor-tristis	395894
Quercus rubra	395677
Gymnema sylvestre	395453
Lavandula angustifolia	395347
Aleurites moluccanus	393727
Plantago major	393138
Prosopis cineraria	392383
Prunus avium	390273
Galium aparine	389794
Betula pendula	389551
Cinnamomum verum	389139
Hibiscus syriacus	388837
Quercus virginiana	388633
Melia azedarach	388518
Cedrus libani	388166
Acer negundo	383865
Ficus lyrata	381406
Cestrum nocturnum	377693
Acmella oleracea	377329
Pinus ponderosa	375779
Adansonia digitata	375441
Strychnos nux-vomica	375403
Basella alba	374847
Fagus sylvatica	374411
Durio zibethinus	373317
Prunus cerasus	371499
Capsicum chinense	369400
Aloysia citrodora	368212
Papaver rhoeas	367582
Galium odoratum	367227
Verbascum thapsus	365246
Tagetes erecta	364809
Kalmia latifolia	362659
Terminalia catappa	360906
Matricaria chamomilla	360582
Cupressus sempervirens	359987
Madhuca longifolia	357898
Brassica rapa	357671
Spondias dulcis	356510
Sorghum bicolor	355844
Justicia adhatoda	351730
Morus alba	351377
Artemisia vulgaris	350743
Actinidia arguta	350439
Arctium lappa	347742
Cucurbita pepo	347368
Asparagus racemosus	346204
Isatis tinctoria	345589
Beta vulgaris	344756
Rudbeckia hirta	343224
Quercus suber	342741
Malpighia emarginata	340634
Dracaena fragrans	340604
Crocus sativus	335198
Quercus robur	334743
Macrotyloma uniflorum	334357
Boswellia serrata	333728
Vitis rotundifolia	333425
Prunus virginiana	333171
Acer pseudoplatanus	332608
Cerbera odollam	331913
Artemisia annua	331168
Peganum harmala	330242
Larix laricina	330035
Sclerocarya birrea	329632
Fragaria vesca	329584
Pterocarpus santalinus	328524
Leontopodium nivale	325662
Magnolia champaca	325534
Citrus australasica	324646
Eclipta prostrata	324537
Vachellia nilotica	322476
Aframomum melegueta	321380
Turnera diffusa	320892
Schefflera arboricola	320804
Elaeis guineensis	320204
Juglans regia	319030
Cyperus rotundus	318325
Prosopis juliflora	317417
Bombax ceiba	317294
Phaseolus lunatus	317265
Berberis vulgaris	317232
Osmanthus fragrans	317154
Nicotiana rustica	315240
Panax ginseng	315140
Rubus leucodermis	314893
Nicotiana tabacum	314794
Pilea peperomioides	311961
Fraxinus excelsior	311394
Hyacinthoides non-scripta	311074
Leucaena leucocephala	310775
Eucalyptus globulus	310470
Rosa canina	309926
Oenothera biennis	309544
Tabernanthe iboga	308268
Sorbus aucuparia	306218
Bixa orellana	304680
Glechoma hederacea	304589
Musa acuminata	304364
Schinus molle	303659
Hydrangea macrophylla	301967
Santalum album	301252
Dracaena draco	300571
Dysphania ambrosioides	300016
Gynostemma pentaphyllum	299829
Larrea tridentata	299031
Allium tuberosum	299027
Zantedeschia aethiopica	297386
Acer saccharinum	297342
Pouteria lucuma	296210
Cylindropuntia fulgida	294681
Areca catechu	292344
Indigofera tinctoria	290317
Tridax procumbens	289265
Ficus racemosa	287758
Psychotria viridis	285646
Viburnum opulus	285586
Rosa rugosa	284954
Acer platanoides	283475
Betula papyrifera	283259
Actaea pachypoda	283007
Averrhoa bilimbi	282964
Saussurea obvallata	280877
Euphorbia milii	280068
Trifolium pratense	279752
Allium fistulosum	277459
Echinacea purpurea	276477
Melissa officinalis	274667
Capsicum frutescens	274515
Solanum dulcamara	273939
Caesalpinia pulcherrima	273480
Cyperus papyrus	273425
Juniperus communis	273306
Crataegus monogyna	273068
Vaccinium myrtillus	272719
Prunus laurocerasus	272531
Stellaria media	272361
Amorphophallus paeoniifolius	272334
Pithecellobium dulce	272105
Cissus quadrangularis	271832
Prunus serrulata	270718
Elaeagnus angustifolia	269693
Amelanchier alnifolia	269265
Portulaca grandiflora	268863
Houttuynia cordata	268272
Actaea racemosa	267668
Eucalyptus regnans	267567
Rhus typhina	267499
Chrysophyllum cainito	267059
Ulmus rubra	265486
Ixora coccinea	264588
Tradescantia pallida	264093
Stevia rebaudiana	264083
Acacia pycnantha	263874
Trachelospermum jasminoides	262328
Nephrolepis exaltata	261091
Leonotis leonurus	260766
Schisandra chinensis	260624
Argyreia nervosa	260458
Parthenium hysterophorus	259629
Millettia pinnata	259506
Couroupita guianensis	258955
Nyssa sylvatica	258643
Trifolium repens	258351
Cornus mas	257747
Annona squamosa	257699
Protea cynaroides	257288
Strelitzia reginae	257134
Angelica sinensis	257026
Cornus kousa	256886
Duranta erecta	256257
Castanea sativa	255872
Tanacetum parthenium	255069
Smilax ornata	254811
Garcinia kola	254759
Dianthus barbatus	252366
Filipendula ulmaria	251436
Digitalis purpurea	250711
Ficus benghalensis	250538
Parkia speciosa	250506
Asclepias tuberosa	250483
Pinus taeda	248936
Vinca minor	248087
Limonia acidissima	248028
Angelica archangelica	247636
Neolamarckia cadamba	246391
Grevillea robusta	246326
Poa pratensis	246066
Equisetum arvense	245504
Vitex negundo	244302
Alstonia scholaris	243421
Pinus radiata	243190
Platanus orientalis	242815
Abies balsamea	242025
Leucanthemum vulgare	241883
Cytisus scoparius	241682
Ulmus americana	241550
Pistacia lentiscus	241151
Crossandra infundibuliformis	238997
Pinus contorta	238631
Tsuga canadensis	238312
Melaleuca alternifolia	238236
Allium chinense	237999
Arum maculatum	237830
Gloriosa superba	237308
Euphorbia hirta	236903
Cascabela thevetia	236307
Fagus grandifolia	235970
Commiphora wightii	235500
Pueraria mirifica	234473
Ulmus parvifolia	234464
Citrullus colocynthis	233849
Gardenia jasminoides	233040
Pandanus tectorius	232433
Murraya paniculata	232281
Annona reticulata	231196
Arundo donax	231168
Ceiba speciosa	230678
Ficus sycomorus	230422
Aegopodium podagraria	230362
Quercus palustris	230304
Metrosideros excelsa	230209
Phoenix roebelenii	230033
Hura crepitans	229510
Quercus ilex	229504
Rubus occidentalis	229317
Gaultheria procumbens	228555
Ilex vomitoria	228413
Salix babylonica	228233
Brassica nigra	227746
Corchorus olitorius	227453
Solanum quitoense	225964
Corylus avellana	225784
Cinnamomum tamala	225673
Citrullus lanatus	225228
Lonicera japonica	225168
Trichosanthes dioica	224193
Juglans cinerea	224135
Ipomoea alba	223407
Achyranthes aspera	223264
Ficus microcarpa	223217
Tilia cordata	222924
Arisaema triphyllum	222815
Viola tricolor	222664
Solanum muricatum	222175
Agathis australis	222144
Alliaria petiolata	221635
Colchicum autumnale	221447
Quercus macrocarpa	221376
Hippophae rhamnoides	220592
Helichrysum italicum	220005
Ilex guayusa	218880
Arbutus menziesii	218415
Rubus idaeus	218334
Panicum virgatum	218266
Carissa carandas	218175
Lonicera caerulea	218147
Rubus spectabilis	218085
Euphorbia tirucalli	217969
Salix alba	217958
Adenium obesum	217774
Tabernaemontana divaricata	217107
Tradescantia zebrina	217043
Acacia koa	216652
Plumeria rubra	216309
Gmelina arborea	216287
Elettaria cardamomum	216084
Pterocarpus indicus	215407
Salvadora persica	214357
Rosa rubiginosa	214247
Plukenetia volubilis	214116
Cortaderia selloana	214094
Perilla frutescens	212950
Lagerstroemia speciosa	212612
Lythrum salicaria	212311
Cercis siliquastrum	211635
Melothria scabra	211080
Artemisia tridentata	210634
Capsella bursa-pastoris	210117
Marrubium vulgare	210096
Lilium longiflorum	209972
Passiflora ligularis	209167
Cucurbita maxima	208990
Beaucarnea recurvata	208366
Portulacaria afra	206694
Oxalis triangularis	206399
Diospyros nigra	205382
Dalbergia melanoxylon	205320
Zanthoxylum piperitum	205246
Gossypium barbadense	204823
Plantago lanceolata	204551
Gliricidia sepium	204471
Alnus glutinosa	204224
Celtis occidentalis	203975
Tilia americana	203637
Mimusops elengi	203020
Salvia apiana	202903
Senna auriculata	201477
Malva sylvestris	200874
Thymus vulgaris	200671
Tecoma stans	200661
Eugenia uniflora	200629
Myristica fragrans	200611
Myrica rubra	200287
Sesbania grandiflora	199883
Boerhavia diffusa	199866
Arctostaphylos uva-ursi	199478
Ficus macrophylla	199288
Mentha arvensis	198967
Amaranthus caudatus	198730
Imperata cylindrica	198686
Cordyline fruticosa	198539
Primula veris	198316
Chamaecyparis obtusa	197567
Aconitum napellus	196902
Acacia dealbata	196541
Asclepias syriaca	196005
Gelsemium sempervirens	195891
Cordyline australis	195822
Datura metel	195803
Jacobaea vulgaris	195784
Coffea canephora	195711
Terminalia bellirica	195198
Eleutherococcus senticosus	194939
Cymbopogon citratus	194649
Codiaeum variegatum	194032
Capsicum baccatum	193792
Picea sitchensis	191817
Populus deltoides	191549
Galanthus nivalis	191198
Chromolaena odorata	191030
Pouteria campechiana	191006
Spondias mombin	190675
Phaseolus coccineus	188913
Alpinia galanga	188614
Vanilla planifolia	188423
Prunella vulgaris	187805
Passiflora caerulea	187613
Cucurbita moschata	187374
Anadenanthera peregrina	187128
Zelkova serrata	186844
Hemidesmus indicus	186089
Prunus armeniaca	185881
Lagerstroemia indica	185382
Fraxinus americana	185012
Ilex aquifolium	184536
Betula nigra	184517
Uncaria tomentosa	184030
Fatsia japonica	183877
Coccoloba uvifera	183471
Symplocarpus foetidus	183372
Myrtus communis	182463
Euonymus alatus	182322
Plectranthus scutellarioides	182284
Canarium ovatum	182052
Oxalis tuberosa	181531
Argemone mexicana	181493
Campsis radicans	181031
Saccharum officinarum	180915
Anthriscus sylvestris	180828
Sandoricum koetjape	180598
Grewia asiatica	180456
Populus tremula	179798
Calotropis procera	179722
Eucalyptus camaldulensis	179520
Casuarina equisetifolia	178819
Posidonia oceanica	178215
Populus alba	177977
Brachychiton acerifolius	177710
Solanum torvum	177529
Fouquieria splendens	177346
Convolvulus arvensis	177344
Metasequoia glyptostroboides	177225
Amaranthus palmeri	176961
Ageratina altissima	176751
Dracaena reflexa	176643
Reynoutria japonica	176555
Melaleuca quinquenervia	176391
Kalanchoe blossfeldiana	175891
Pinus palustris	175864
Catalpa speciosa	175769
Stachys byzantina	175767
Celosia argentea	174994
Lamium purpureum	174852
Trachycarpus fortunei	174812
Mesua ferrea	174664
Chamaemelum nobile	173749
Darlingtonia californica	173600
Erythroxylum coca	173347
Syzygium jambos	173155
Washingtonia filifera	173105
Victoria amazonica	172908
Capsicum pubescens	172819
Pinus gerardiana	172286
Pelargonium graveolens	172188
Plantago ovata	172111
Pinus nigra	172103
Symphytum officinale	171304
Viscum album	171057
Prunus domestica	170889
Canna indica	170861
Pinus resinosa	170495
Poa annua	170318
Acalypha indica	170278
Tragopogon porrifolius	170067
Nypa fruticans	170016
Ephedra sinica	169783
Heracleum sphondylium	169730
Hydrangea quercifolia	168931
Lawsonia inermis	168895
Luffa aegyptiaca	168331
Buxus sempervirens	167799
Diospyros virginiana	167561
Phoenix canariensis	167505
Araucaria bidwillii	167164
Lotus corniculatus	166991
Ilex verticillata	166461
Combretum indicum	165856
Persicaria odorata	165830
Cyathea dealbata	164597
Lycium barbarum	164320
Syzygium malaccense	164120
Musa balbisiana	163871
Lavandula stoechas	163739
Chamaedorea elegans	163386
Triadica sebifera	163072
Morus nigra	162783
Washingtonia robusta	162711
Lunaria annua	162665
Impatiens capensis	162465
Dracaena sanderiana	161844
Prunus padus	160804
Hoya carnosa	160639
Taxus brevifolia	160387
Boswellia sacra	160243
Fraxinus pennsylvanica	159588
Backhousia citriodora	159198
Pteridium aquilinum	159095
Cypripedium reginae	159074
Vitis labrusca	158824
Swietenia macrophylla	158817
Carpinus betulus	158663
Hamamelis virginiana	158617
Thymus serpyllum	158372
Koelreuteria paniculata	158337
Ambrosia artemisiifolia	158144
Liriope muscari	157983
Carpinus caroliniana	157238
Calea ternifolia	157024
Selaginella lepidophylla	156510
Guizotia abyssinica	156382
Jasminum officinale	156370
Bidens pilosa	156276
Ficus pumila	156147
Albizia lebbeck	155903
Vaccinium corymbosum	155898
Averrhoa carambola	155884
Picea mariana	155782
Lolium perenne	155669
Phyllanthus acidus	155586
Vigna aconitifolia	155373
Oxalis stricta	154842
Lathyrus sativus	154113
Asclepias curassavica	153621
Pachycereus pringlei	153227
Actinidia polygama	153222
Phalaris arundinacea	153123
Rosa multiflora	152868
Camelina sativa	152646
Impatiens balsamina	152244
Carya ovata	151926
Artocarpus integer	151398
Roystonea regia	151372
Adansonia gregorii	151240
Kaempferia galanga	151165
Viola odorata	150955
Rumex crispus	150723
Lilium candidum	150630
Adansonia grandidieri	150237
Dendrophylax lindenii	149830
Magnolia liliiflora	149658
Mentha aquatica	149638
Spondias purpurea	149532
Tsuga heterophylla	149153
Strelitzia nicolai	148827
Pinus roxburghii	148742
Trichosanthes cucumerina	148234
Cnidoscolus aconitifolius	148205
Myrciaria dubia	147808
Salvia sclarea	147737
Tropaeolum majus	147397
Santalum acuminatum	147136
Eupatorium perfoliatum	147070
Chlorophytum borivilianum	146958
Anthurium andraeanum	146701
Magnolia virginiana	146369
Viola sororia	146352
Dioscorea bulbifera	145965
Datura innoxia	145794
Ulmus glabra	145203
Crotalaria cunninghamii	144937
Quercus velutina	144901
Pistacia chinensis	144838
Pyrus communis	144690
Glebionis coronaria	144580
Calophyllum inophyllum	144445
Swietenia mahagoni	144412
Pieris japonica	144267
Abies concolor	144059
Nymphaea nouchali	144042
Catalpa bignonioides	143882
Ensete ventricosum	143790
Asparagus aethiopicus	143173
Allocasuarina luehmannii	143078
Carpobrotus edulis	142939
Miscanthus sinensis	142916
Trillium grandiflorum	142729
Leonurus cardiaca	142679
Helleborus niger	142415
Lobularia maritima	142393
Styphnolobium japonicum	141412
Elymus repens	140705
Verbena bonariensis	140627
Plectranthus barbatus	140111
Sarracenia purpurea	139504
Apocynum cannabinum	139458
Syagrus romanzoffiana	139294
Blumea balsamifera	138999
Heracleum maximum	138808
Lactuca serriola	138804
Momordica dioica	138706
Ziziphus spina-christi	138474
Hesperis matronalis	137880
Bambusa vulgaris	137572
Abies alba	137071
Populus nigra	136932
Ipomoea tricolor	136818
Quercus agrifolia	136746
Alternanthera sessilis	136717
Bursera simaruba	136544
Bougainvillea glabra	136426
Byrsonima crassifolia	136361
Impatiens glandulifera	136174
Parthenocissus tricuspidata	136154
Tagetes lucida	136082
Acacia melanoxylon	135923
Rhapis excelsa	135716
Phoenix dactylifera	135517
Cedrus atlantica	135387
Senegalia catechu	135212
Carapichea ipecacuanha	135089
Cucurbita ficifolia	134966
Nardostachys jatamansi	134649
Echinopsis lageniformis	134258
Camellia sasanqua	134080
Senna alexandrina	133819
Aldrovanda vesiculosa	133804
Carissa macrocarpa	133772
Aspidistra elatior	133740
Cornus sericea	133534
Drosera capensis	133530
Stephanotis floribunda	133101
Claytonia perfoliata	132989
Elaeagnus umbellata	132801
Syzygium smithii	132788
Strongylodon macrobotrys	132686
Rosa chinensis	132618
Magnolia stellata	132531
Caltha palustris	132425
Rumex obtusifolius	132372
Echinocactus grusonii	132360
Thespesia populnea	132309
Iris versicolor	131531
Pinus halepensis	131464
Wisteria sinensis	131408
Rubia cordifolia	131094
Syngonium podophyllum	131058
Gomphrena globosa	130666
Crataegus mexicana	130506
Acanthus mollis	130236
Acacia confusa	130211
Rosa acicularis	129712
Hibiscus mutabilis	129525
Chamaecyparis lawsoniana	129344
Scorzonera hispanica	129329
Peperomia pellucida	129155
Rubus phoenicolasius	128732
Galega officinalis	128370
Cirsium arvense	128094
Iris pseudacorus	127797
Hoodia gordonii	127776
Morus rubra	127735
Gerbera jamesonii	127706
Senna alata	126709
Crataegus pinnatifida	126686
Bougainvillea spectabilis	126527
Vinca major	126526
Diospyros melanoxylon	126347
Crotalaria juncea	126243
Brachychiton rupestris	125850
Dillenia indica	125581
Gnetum gnemon	125507
Pinus lambertiana	125070
Alkanna tinctoria	124737
Aucuba japonica	124672
Abies nordmanniana	124428
Mentha spicata	124349
Adenanthera pavonina	124139
Solanum carolinense	124004
Baptisia australis	123964
Toxicodendron vernicifluum	123894
Acer macrophyllum	123642
Sida cordifolia	123622
Lobelia cardinalis	123555
Semecarpus anacardium	123345
Drimia maritima	123344
Ageratum conyzoides	123146
Salix caprea	123122
Populus trichocarpa	123067
Amaranthus dubius	123036
Berberis thunbergii	122823
Dracunculus vulgaris	122808
Nigella damascena	122780
Monarda fistulosa	122777
Geranium robertianum	122531
Schefflera actinophylla	122315
Selaginella bryopteris	122288
Selenicereus grandiflorus	122223
Dracaena braunii	122054
Viburnum tinus	121359
Irvingia gabonensis	121170
Cirsium vulgare	120857
Pinus pinaster	120751
Ajuga reptans	120682
Rumex acetosella	120407
Matthiola incana	120270
Piper auritum	120181
Etlingera elatior	119645
Jasminum polyanthum	119626
Bauhinia variegata	119400
Datura wrightii	119177
Pelargonium sidoides	119119
Pinus mugo	119101
Strobilanthes kunthiana	118784
Rhipsalis baccifera	118646
Lysimachia nummularia	118397
Eucalyptus marginata	118312
Typha latifolia	118050
Lupinus texensis	118005
Acacia auriculiformis	117954
Salvia miltiorrhiza	117810
Platostoma palustre	117667
Vigna subterranea	117586
Metrosideros polymorpha	117584
Millettia laurentii	117370
Tradescantia spathacea	117258
Amaranthus viridis	117256
Oxalis corniculata	117080
Impatiens walleriana	116858
Hemerocallis fulva	116473
Oxalis pes-caprae	116003
Antirrhinum majus	115703
Anemone coronaria	115414
Gaultheria shallon	115381
Asplenium nidus	114741
Cosmos bipinnatus	114722
Juniperus ashei	114680
Parkia biglobosa	114654
Corypha umbraculifera	114636
Aloe arborescens	114496
Narcissus pseudonarcissus	114409
Papaver orientale	114258
Nepenthes rajah	114175
Maranta leuconeura	113934
Oryza glaberrima	113850
Crescentia cujete	113583
Scutellaria lateriflora	113504
Leucas aspera	113172
Psidium cattleyanum	112875
Scutellaria baicalensis	112739
Acacia mearnsii	112733
Pinus elliottii	112443
Corymbia citriodora	112440
Hypochaeris radicata	112428
Malus sylvestris	112378
Myrica gale	112305
Quercus nigra	112210
Ruscus aculeatus	112109
Rhizophora mangle	112100
Rubia tinctorum	112094
Toona sinensis	111806
Betula alleghaniensis	111659
Lindera benzoin	111506
Peltophorum pterocarpum	111424
Zanthoxylum americanum	111371
Oxalis acetosella	111298
Coffea liberica	110779
Bactris gasipaes	110182
Ilex opaca	110110
Telfairia occidentalis	109986
Gynura procumbens	109895
Verbena officinalis	109843
Amaryllis belladonna	109813
Codariocalyx motorius	109686
Fritillaria meleagris	109676
Acer campestre	109474
Daphne odora	109437
Nepeta cataria	109339
Abutilon indicum	109249
Brosimum alicastrum	109209
Alcea rosea	108921
Phyllostachys edulis	108846
Gossypium hirsutum	108747
Quercus petraea	108620
Asparagus setaceus	108593
Maranta arundinacea	108509
Zingiber zerumbet	108480
Hypoestes phyllostachya	108433
Echium candicans	108382
Apios americana	108084
Rhododendron ponticum	108046
Eleusine indica	107936
Clivia miniata	107656
Silene stenophylla	107581
Akebia quinata	107430
Nymphaea lotus	107239
Pinus rigida	106955
Betula pubescens	106833
Salvinia molesta	106407
Amaranthus retroflexus	106363
Artocarpus odoratissimus	106038
Cereus repandus	105972
Hibiscus tiliaceus	105644
Dalbergia latifolia	105610
Pterocarpus marsupium	105182
Larix decidua	104979
Ostrya virginiana	104860
Juniperus chinensis	104853
Enterolobium cyclocarpum	104525
Panax notoginseng	104460
Papaver bracteatum	104431
Luffa acutangula	104427
Equisetum hyemale	104389
Plumbago auriculata	103760
Eruca vesicaria	103680
Callicarpa americana	103671
Gymnocalycium mihanovichii	103667
Campanula rotundifolia	103600
Araucaria columnaris	103480
Dactylis glomerata	103289
Ocimum gratissimum	103281
Euphorbia trigona	103129
Epigaea repens	102904
Aerva lanata	102820
Chamaecostus cuspidatus	102343
Monarda didyma	102329
Conocarpus erectus	102226
Lilium lancifolium	102217
Araucaria angustifolia	102036
Empetrum nigrum	101871
Rosa banksiae	101866
Musa velutina	101827
Berberis aristata	101716
Pangium edule	101463
Cornus canadensis	101456
Paeonia lactiflora	101423
Magnolia acuminata	101421
Quercus bicolor	101419
Lobelia inflata	101153
Cardamine hirsuta	101094
Orchis italica	100990
Saponaria officinalis	100948
Boesenbergia rotunda	100764
Tabebuia rosea	100691
Pittosporum tobira	100626
Griffonia simplicifolia	100620
Aristotelia chilensis	100582
Linaria vulgaris	100507
Prunus americana	100401
Commelina communis	100356
Bassia scoparia	100314
Fritillaria imperialis	100308
Pouteria caimito	100189
Dalbergia nigra	100174
Galinsoga parviflora	99909
Sambucus canadensis	99547
Polystichum munitum	99419
Tithonia diversifolia	99152
